# Supplementary material for: Nanoporous copolymer networks through multiple Friedel–Crafts-alkylation—studies on hydrogen and methane storage
Source: Royal Society of Chemistry journal article supplement (doi:10.1039/c0jm03017a), 2010-12-23
Supplement: c0jm03017a.pdf [file c0jm03017a.pdf]

# Electronic Supplementary Information

For the manuscript

## Nanoporous Copolymer Networks Through Multiple Friedel-Crafts-Alkylation - Studies on Methane and Hydrogen Storage

by

**Matthias Georg Schwab,<sup>\*a</sup> Angela Lennert,<sup>b,d</sup>**

**Jörg Pahnke,<sup>b</sup> Gerhard Jonschker,<sup>b</sup> Matthias Koch,<sup>b</sup> Irena Senkovska,<sup>c</sup> Matthias Rehahn<sup>d</sup> and Stefan Kaskel<sup>\*c</sup>**

<sup>a</sup>Max Planck Institute for Polymer Research  
Ackermannweg 10, D-55128 Mainz, Germany  
schwab@mpip-mainz.mpg.de

<sup>b</sup>Merck KGaA  
Frankfurter Straße 250, D-64293 Darmstadt, Germany

<sup>c</sup>Dresden University of Technology  
Department of Inorganic Chemistry  
Bergstraße 66, D-01062 Dresden, Germany  
stefan.kaskel@chemie.tu-dresden.de

<sup>d</sup>Darmstadt University of Technology  
Ernst-Berl-Institute for Technical and Macromolecular Chemistry  
Petersenstraße 22, D-64287 Darmstadt, Germany

## Materials and methods

The starting materials were purchased from Aldrich (4,4'-bis(chloromethyl)biphenyl, iron(III)chloride), ABCR (fluorene), Merck (9,9'-spirobi(fluorene), dibenzofuran, dibenzothiophene, 1,2-dichloroethane). The compounds were used as received without further purification.

Fourier transform infrared (FTIR) spectra were collected using KBr pellets on a Bruker Equinox55 spectrometer.

SEM measurements were performed on a Carl Zeiss Supra 35 scanning electron microscope.

$^{13}\text{C}$  [1H] cross-polarization magic angle spinning (CP-MAS) NMR spectra were measured on a Bruker Avance 400 operating at 100.68 MHz for  $^{13}\text{C}$  and 400.4 for  $^1\text{H}$ . The NMR experiments were carried out at MAS of 10.0 kHz using zirconia rotors of 4 mm in diameter.

Nitrogen adsorption experiments and micropore analysis were conducted at 77 K using an ASAP 2420 from Micromeritics and a Quantachrome Autosorb1C apparatus. Before adsorption measurements, the samples were degassed in vacuum at 473 K for 12 h. Pore volumes at  $p/p_0 = 0.1$  and  $p/p_0 = 0.8$  were converted into the corresponding liquid volumes using a nitrogen density of  $1.25 \cdot 10^{-3} \text{ g/cm}^3$  (gaseous) and  $8.10 \cdot 10^{-1} \text{ g/cm}^3$  (liquid).

Low pressure hydrogen adsorption isotherms were measured at 77 K up to 1 bar using a Quantachrome Autosorb1C apparatus. Before adsorption measurements, the samples were degassed in vacuum at 473 K for 12 h. Gravimetric storage capacities were calculated using a hydrogen density of  $8.99 \cdot 10^{-5} \text{ g/cm}^3$  (gaseous).

High-pressure methane adsorption measurements were conducted at room temperature using a Rubotherm magnetic suspension balance. Prior to the measurements, the samples were degassed at 473 K for 12 h.

High purity gases were used for the adsorption measurements (nitrogen: 99.999 %, hydrogen: 99.999 %, methane: 99.5 %).

## Experimental section

### General synthetic procedure

4,4'-bis(chloromethyl)biphenyl and the corresponding comonomer (see tables below) are dissolved in 40 ml of dry 1,2-dichloroethane. The solution is degassed by argon bubbling and iron(III)chloride is added. Subsequently, the reaction mixture is heated to 80 °C for 18 h under an inert atmosphere. The resulting precipitate is collected by filtration and thoroughly washed with water, methanol and methyl *tert*-butyl ether. The samples are dried at 80 °C under reduced pressure.

Table S1. Networks containing 10 mol% of comonomer.

|                                 | <b>FLUO-10</b> | <b>sFLUO-10</b> | <b>DBF-10</b> | <b>DBT-10</b> |
|---------------------------------|----------------|-----------------|---------------|---------------|
| <b>BCMBP [mmol]</b>             | 3.71           | 3.49            | 3.71          | 3.68          |
| <b>BCMBP [mg]</b>               | 981            | 923             | 980           | 973           |
| <b>comonomer [mmol]</b>         | 0.41           | 0.39            | 0.41          | 0.41          |
| <b>comonomer [mg]</b>           | 70             | 124             | 71            | 77            |
| <b>iron(III)chloride [mmol]</b> | 4.12           | 3.88            | 4.12          | 4.09          |
| <b>iron(III)chloride [mg]</b>   | 682            | 642             | 682           | 678           |

Table S2. Networks containing 25 mol% of comonomer.

|                                 | <b>FLUO-25</b> | <b>sFLUO-25</b> | <b>DBF-25</b> | <b>DBT-25</b> |
|---------------------------------|----------------|-----------------|---------------|---------------|
| <b>BCMBP [mmol]</b>             | 3.26           | 2.80            | 3.26          | 3.20          |
| <b>BCMBP [mg]</b>               | 862            | 741             | 861           | 846           |
| <b>comonomer [mmol]</b>         | 1.09           | 0.93            | 1.09          | 1.07          |
| <b>comonomer [mg]</b>           | 184            | 299             | 188           | 201           |
| <b>iron(III)chloride [mmol]</b> | 4.35           | 3.73            | 4.35          | 4.27          |
| <b>iron(III)chloride [mg]</b>   | 719            | 618             | 718           | 706           |

## Fourier-Transform Infrared Spectroscopy (FTIR)

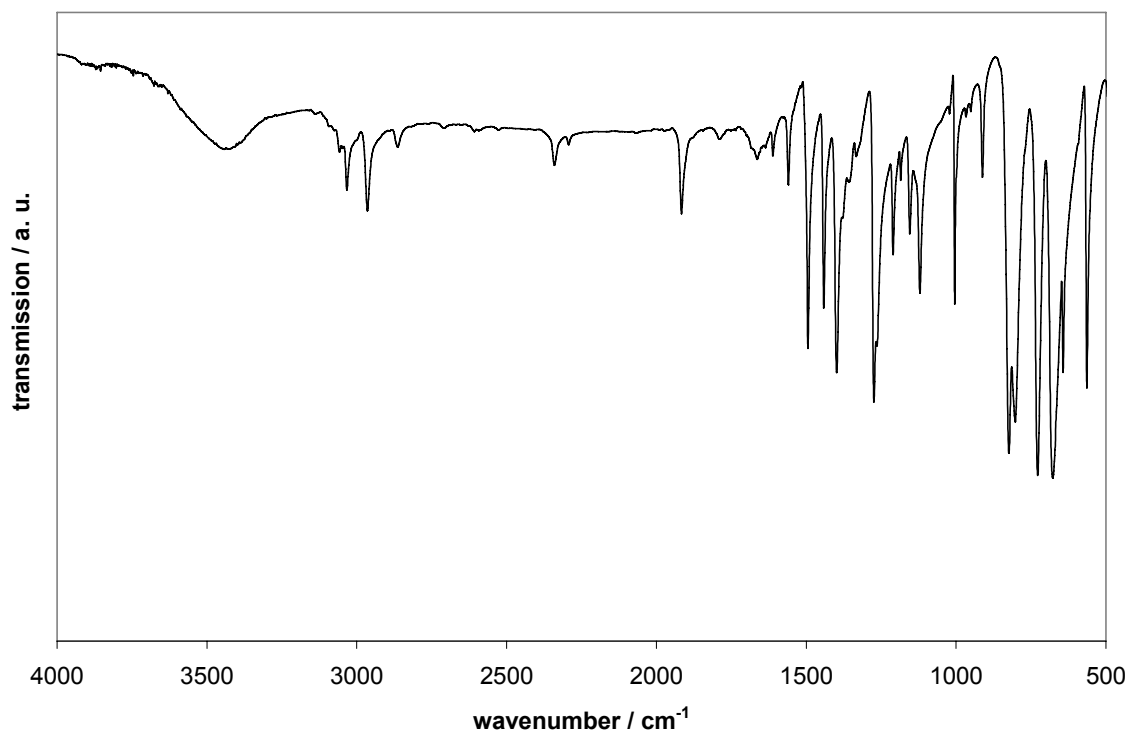

Figure S1. Fourier transform infrared (FTIR) spectra of the monomer **BCMBP**.

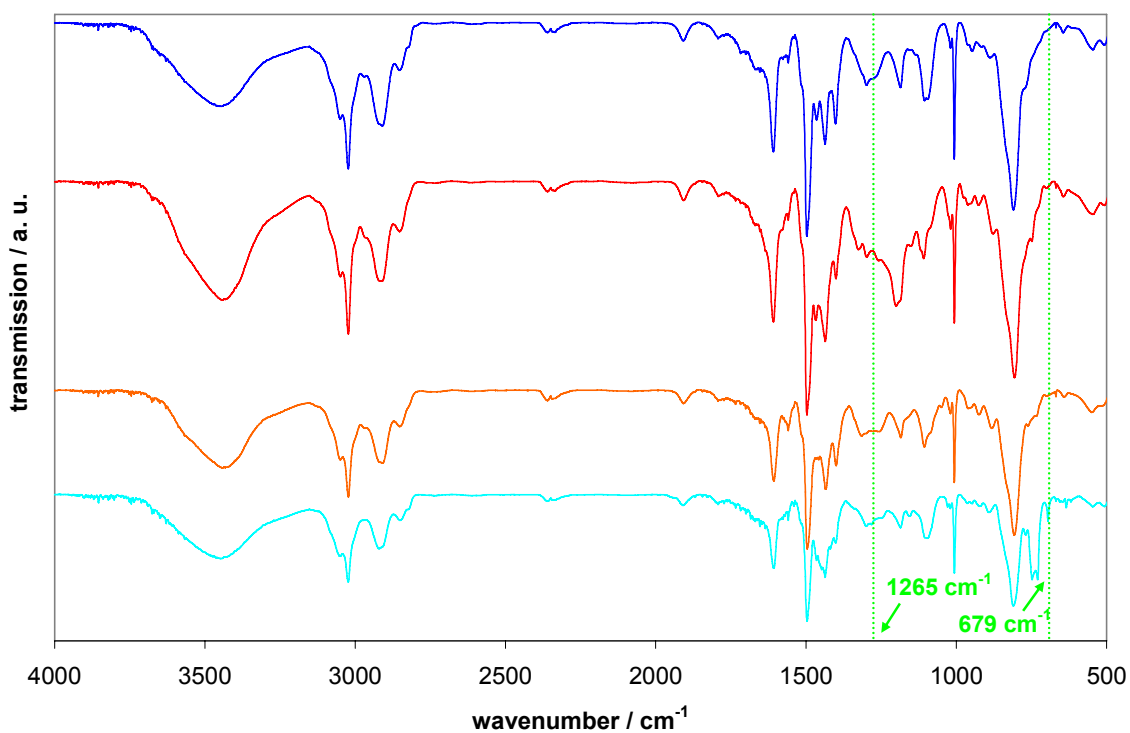

Figure S2. Fourier transform infrared (FTIR) spectra of **FLUO-25**, **sFLUO-25**, **DBF-25** and **DBT-25**.

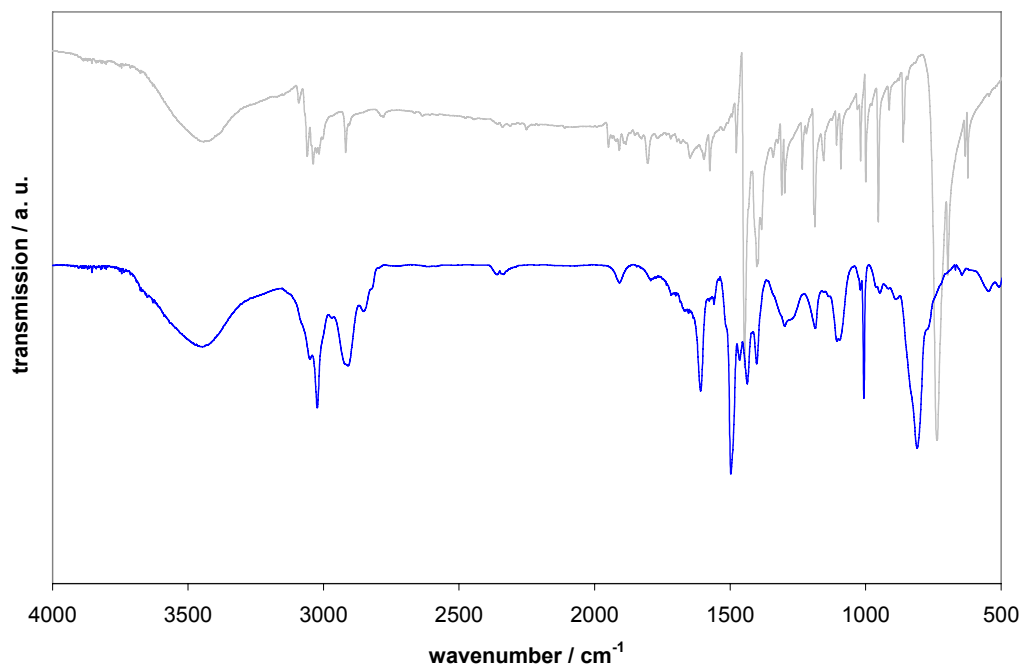

**Figure S3.** Fourier transform infrared (FTIR) spectra of **FLUO** and **FLUO-25**.

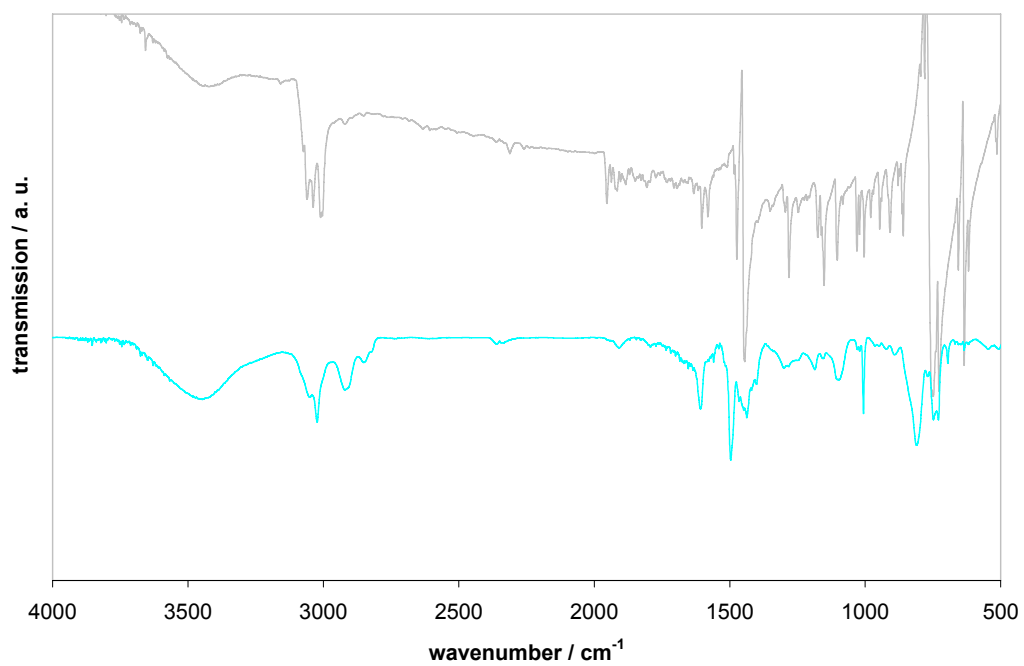

**Figure S4.** Fourier transform infrared (FTIR) spectra of **sFLUO** and **sFLUO-25**.

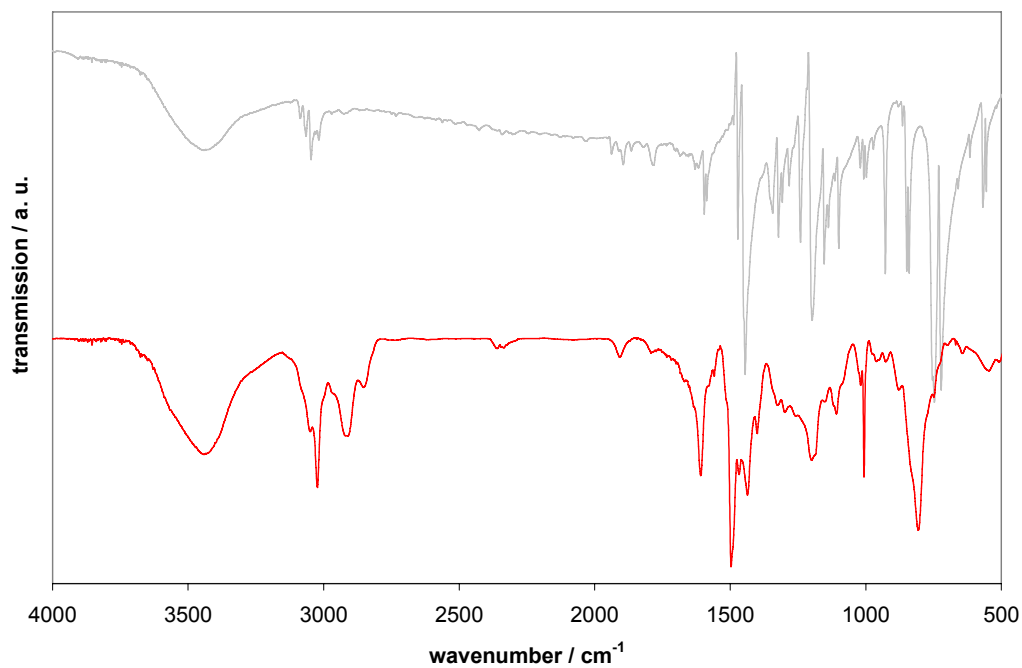

**Figure S5.** Fourier transform infrared (FTIR) spectra of **DBF** and **DBF-25**.

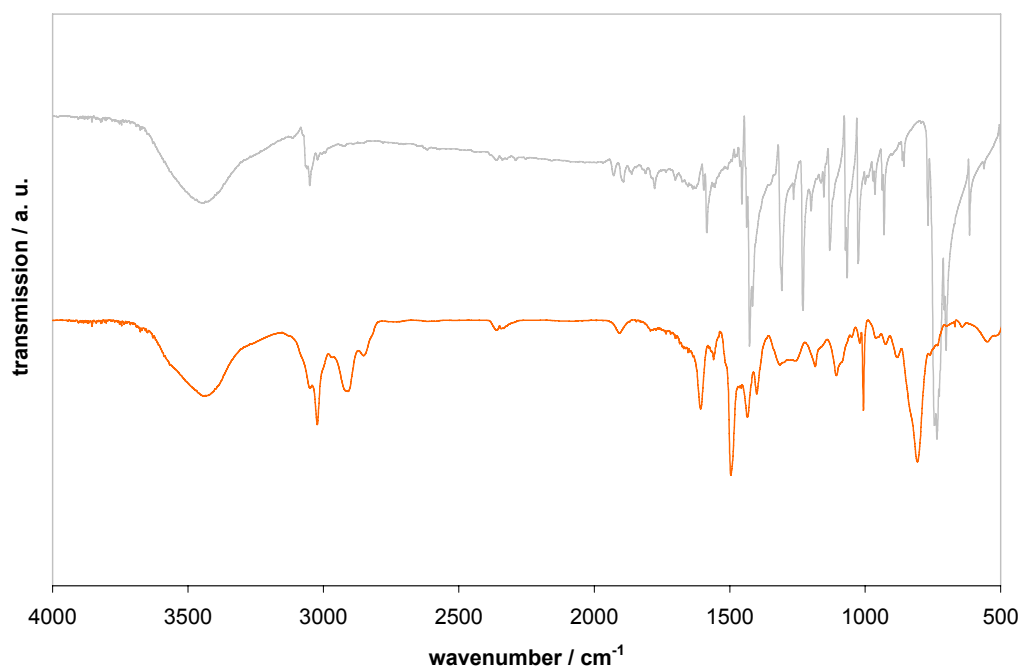

**Figure S6.** Fourier transform infrared (FTIR) spectra of **DBT** and **DBT-25**.

## $^{13}\text{C}$ cross-polarization magic angle spinning (CP-MAS) NMR

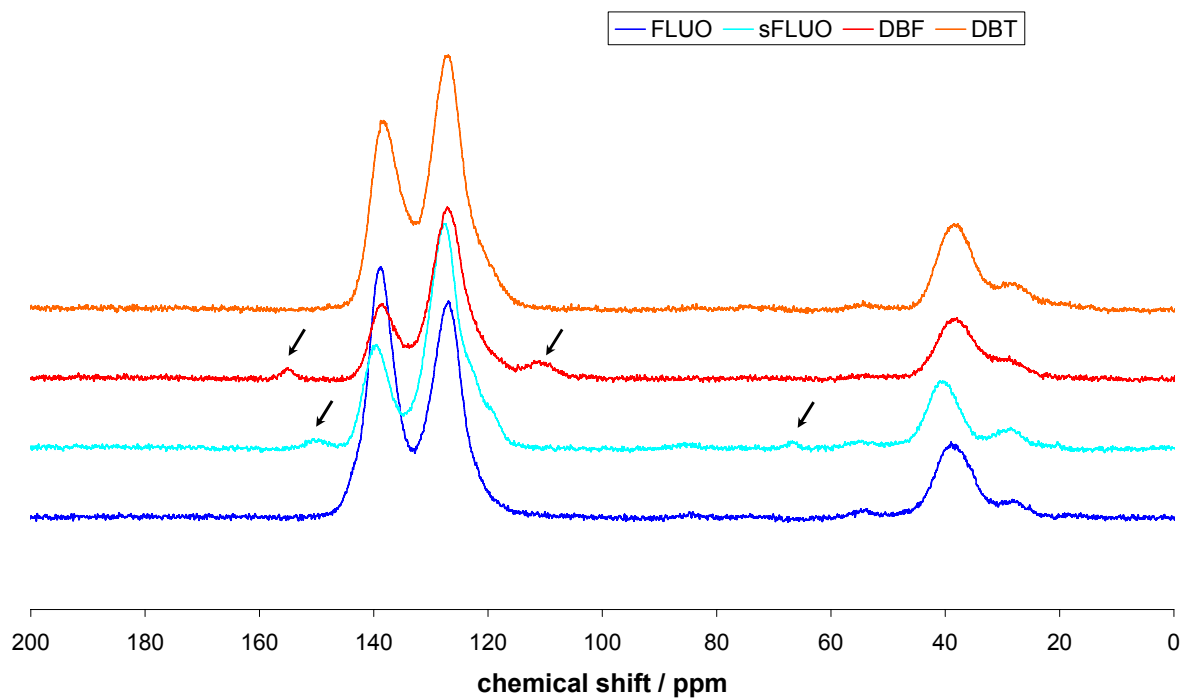

Figure S7.  $^{13}\text{C}$  CP-MAS NMR spectra of FLUO-25, sFLUO-25, DBF-25 and DBT-25.

## Nitrogen adsorption analysis

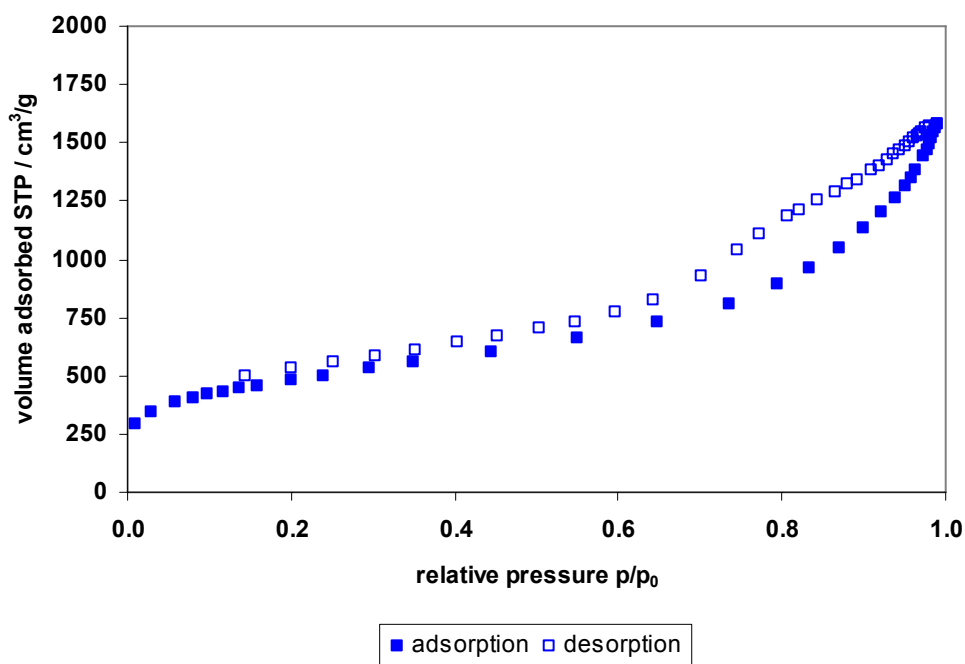

Figure S8. Nitrogen sorption (filled symbols) and desorption (empty symbols) isotherms of FLUO-10.

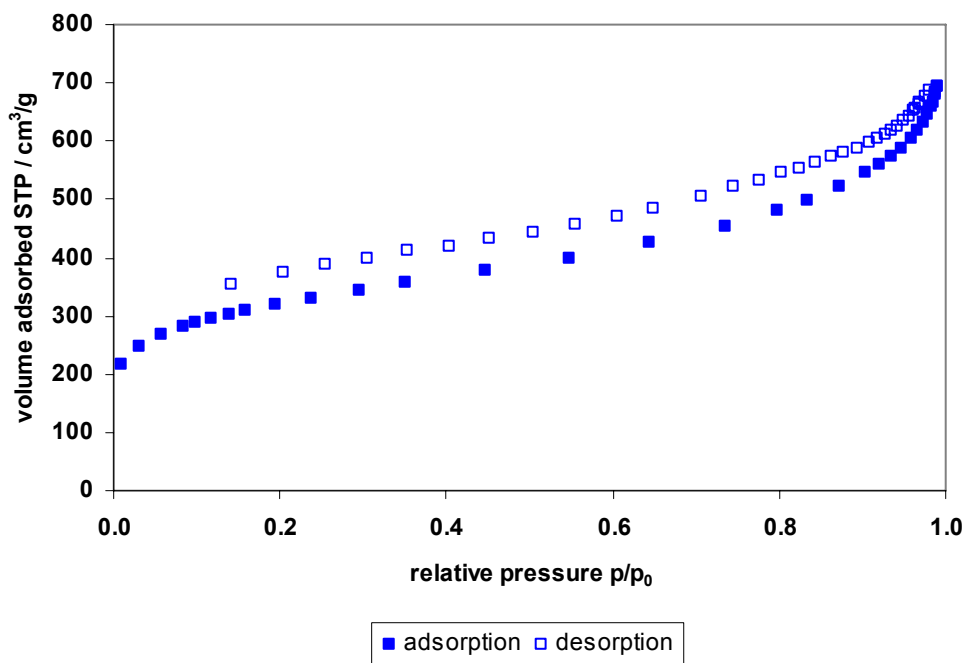

Figure S9. Nitrogen sorption (filled symbols) and desorption (empty symbols) isotherms of FLUO-25.



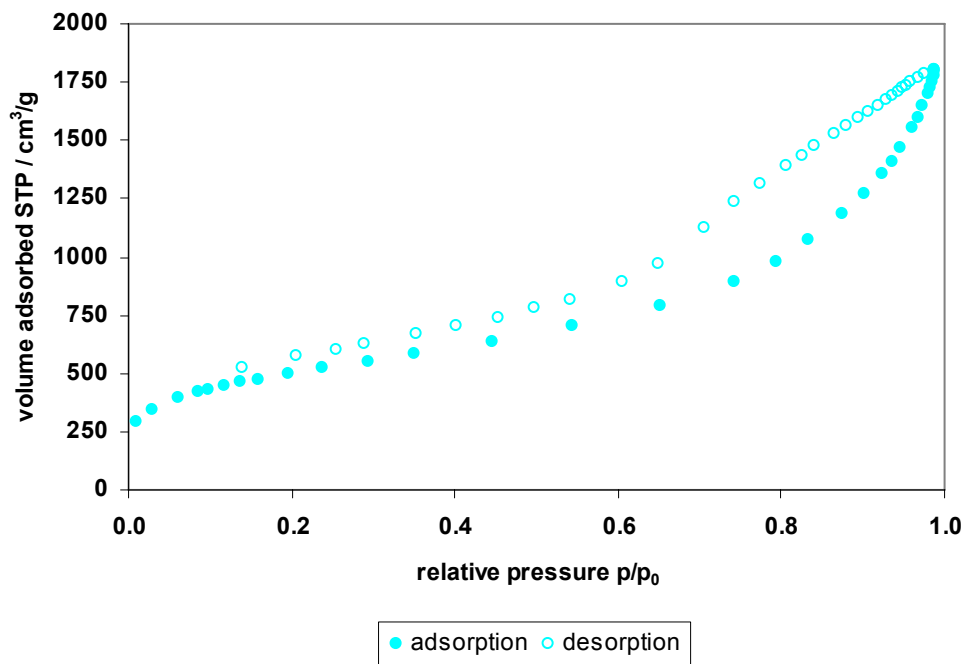

Figure S10. Nitrogen sorption (filled symbols) and desorption (empty symbols) isotherms of sFLUO-10.

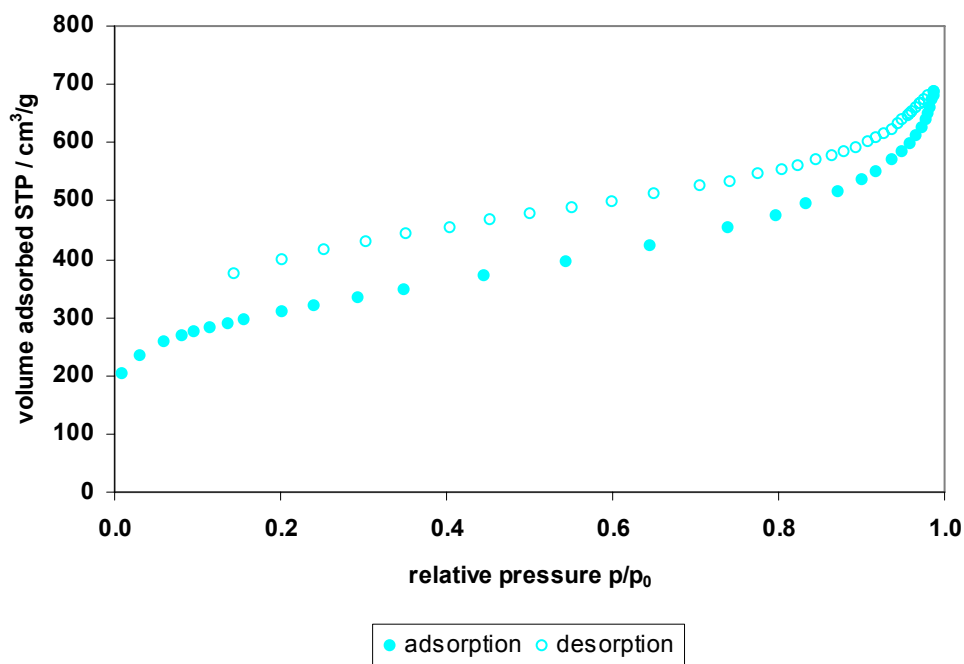

Figure S11. Nitrogen sorption (filled symbols) and desorption (empty symbols) isotherms of sFLUO-25.

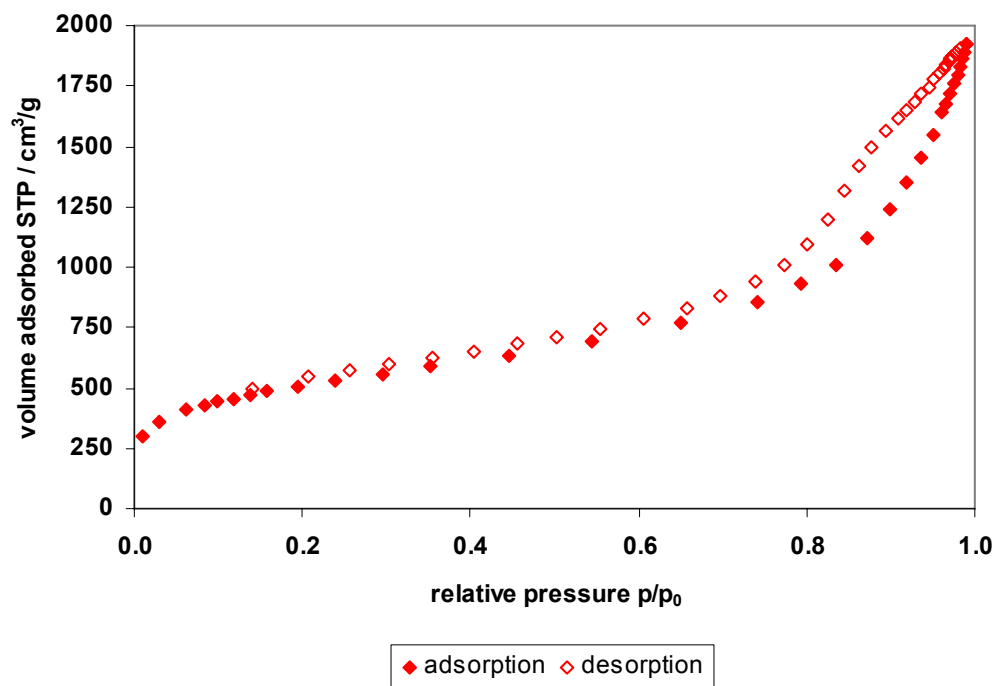

Figure S12. Nitrogen sorption (filled symbols) and desorption (empty symbols) isotherms of DBF-10.

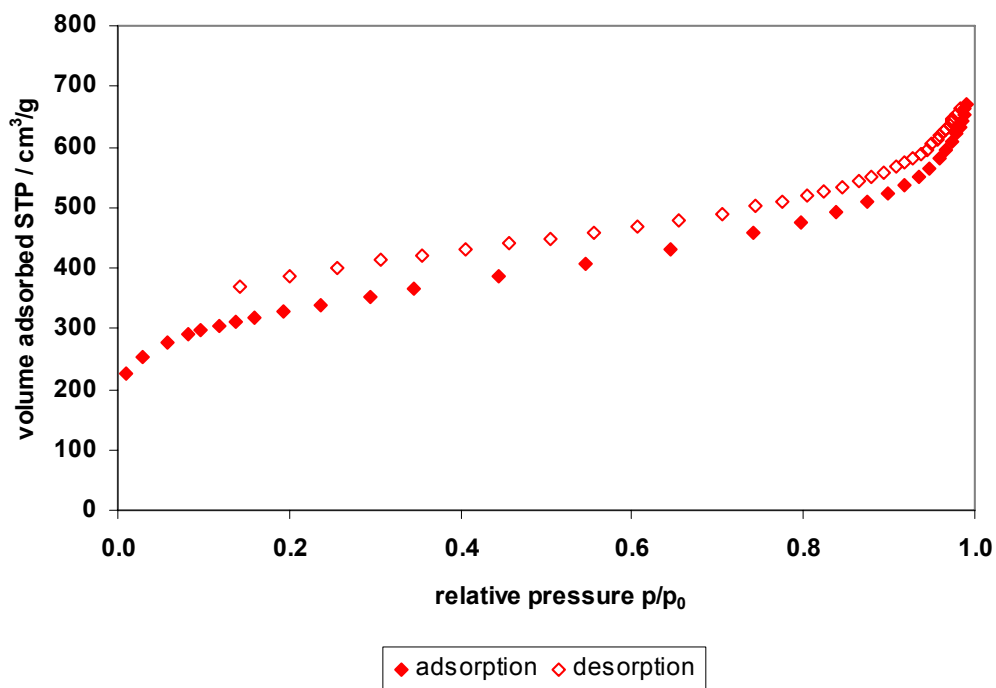

Figure S13. Nitrogen sorption (filled symbols) and desorption (empty symbols) isotherms of DBF-25.

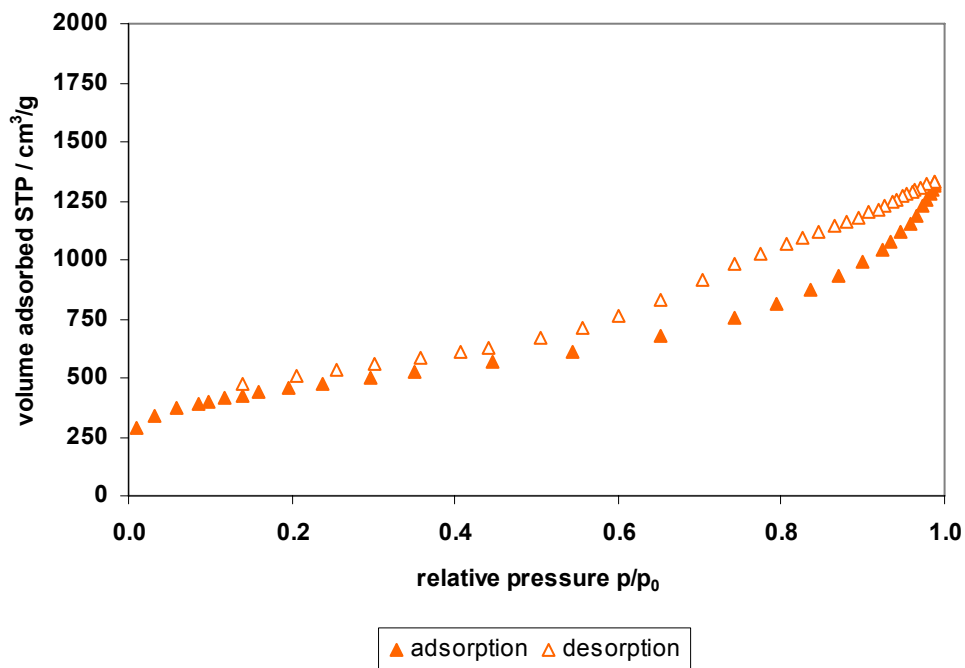

Figure S14. Nitrogen sorption (filled symbols) and desorption (empty symbols) isotherms of DBT-10.

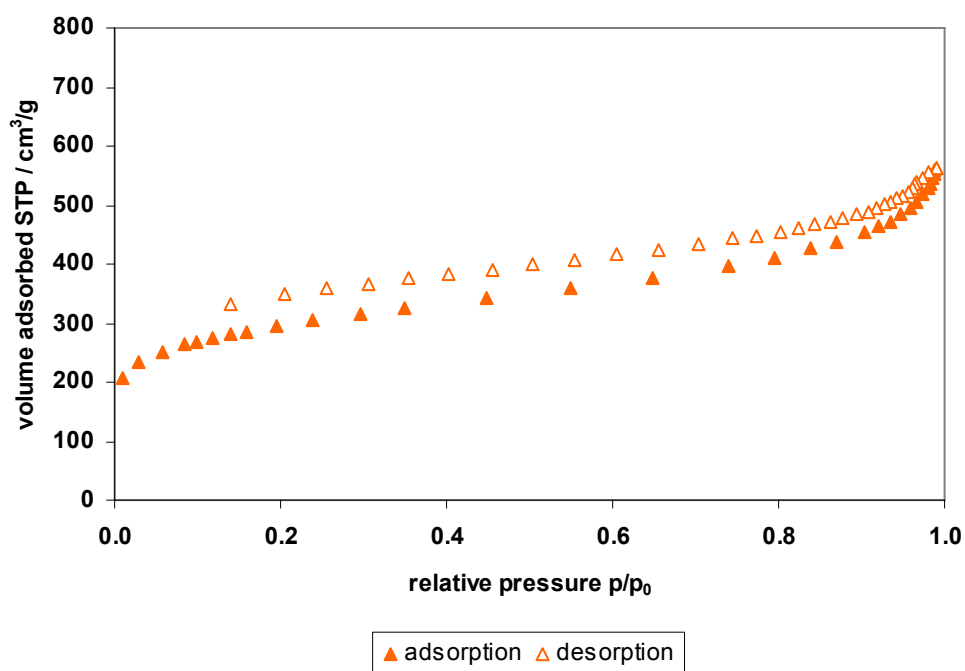

Figure S15. Nitrogen sorption (filled symbols) and desorption (empty symbols) isotherms of DBT-25.

## Hydrogen adsorption analysis

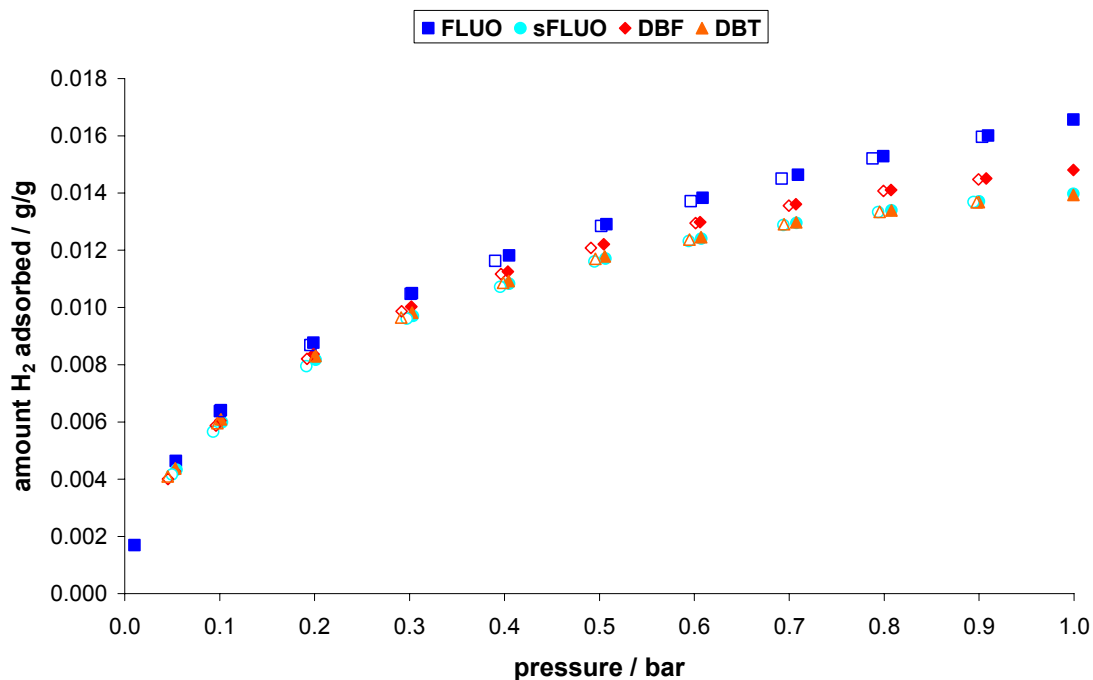

Figure S16. Volumetric hydrogen adsorption (filled) and desorption (empty symbols) isotherms of copolymer networks containing 10 mol% comonomer.

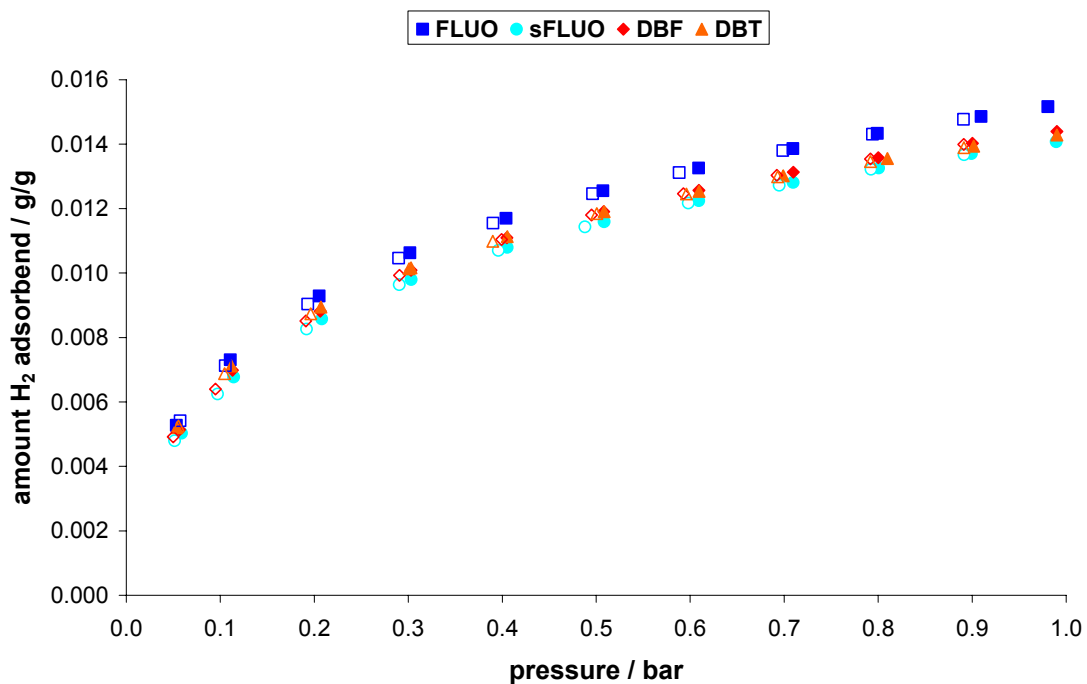

Figure S17. Volumetric hydrogen adsorption (filled) and desorption (empty symbols) isotherms of copolymer networks containing 25 % comonomer.

## High pressure methane adsorption analysis

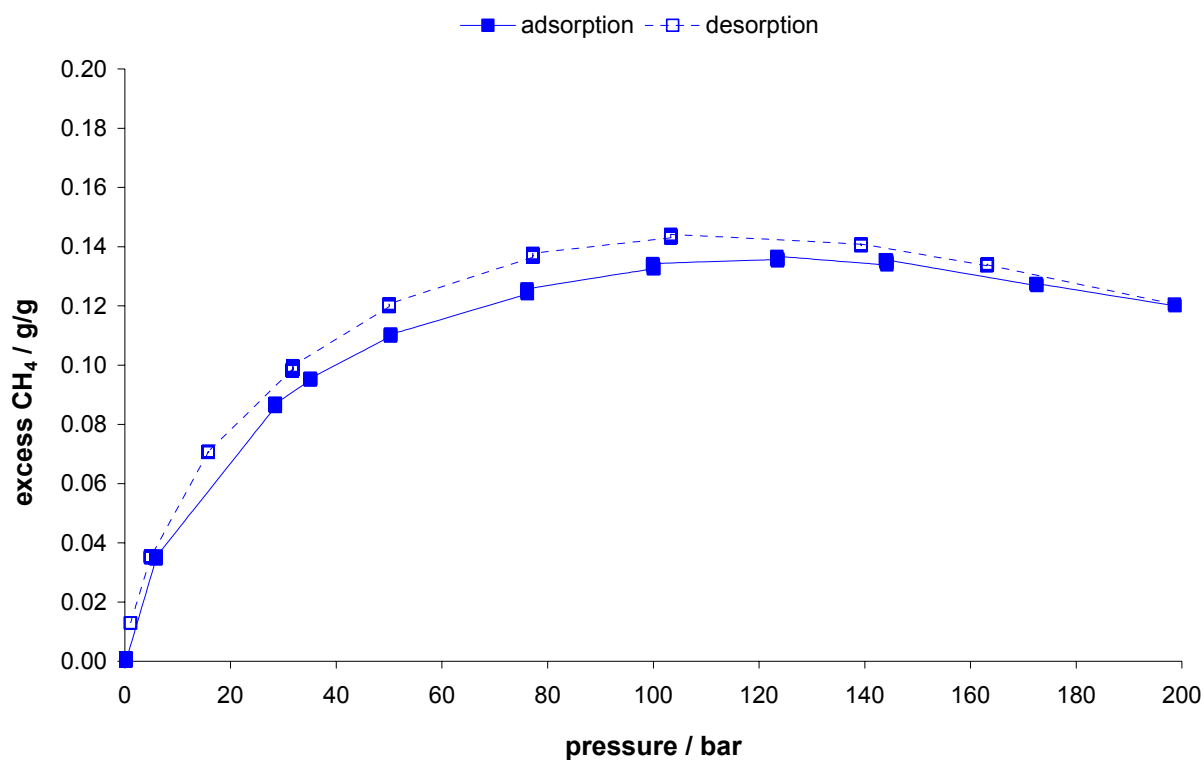

Figure S18. High pressure gravimetric methane adsorption and desorption isotherm of FLUO-10.

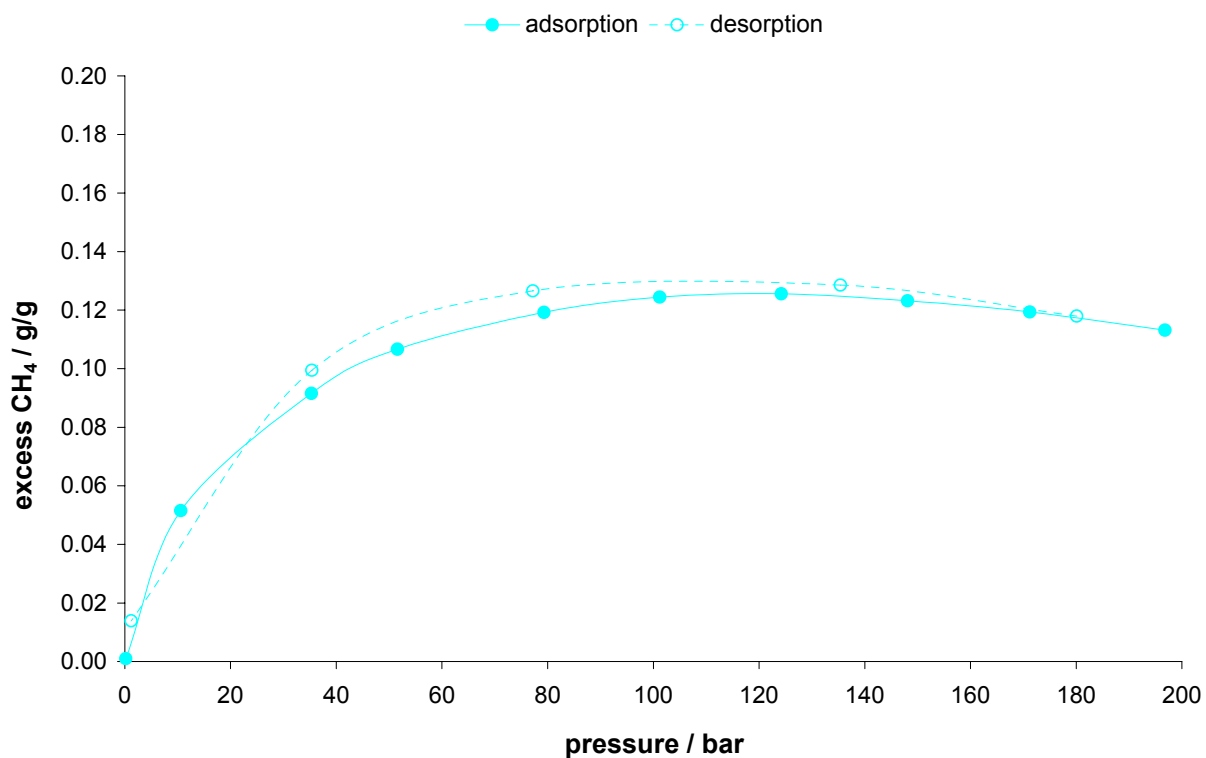

Figure S19. High pressure gravimetric methane adsorption and desorption isotherm of sFLUO-10.

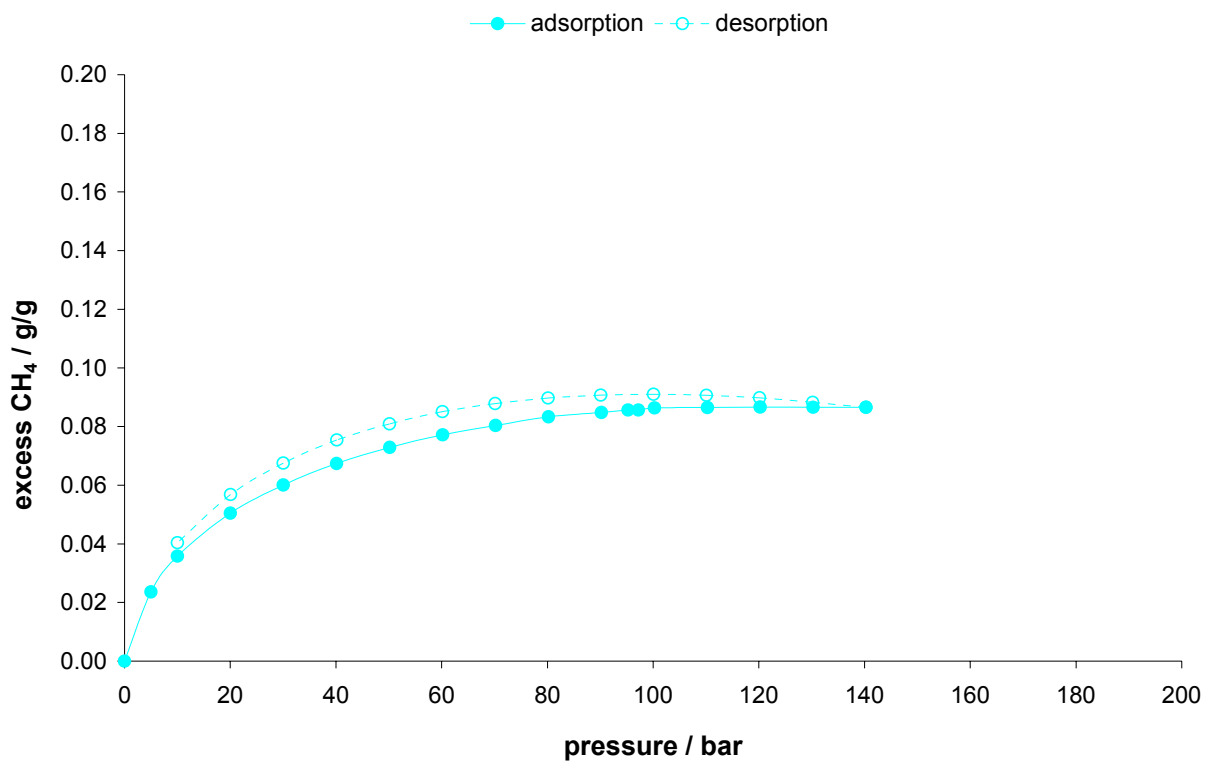

Figure S20. High pressure gravimetric methane adsorption and desorption isotherm of sFLUO-25.

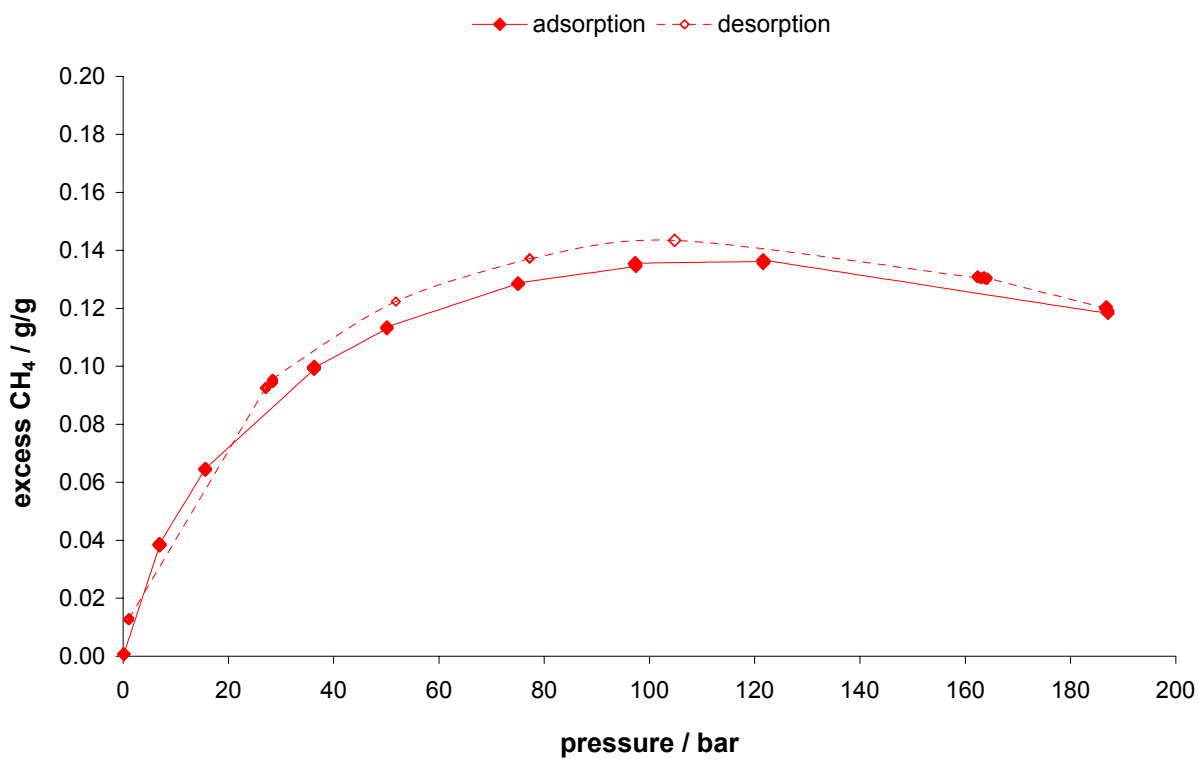

Figure S21. High pressure gravimetric methane adsorption and desorption isotherm of DBF-10.

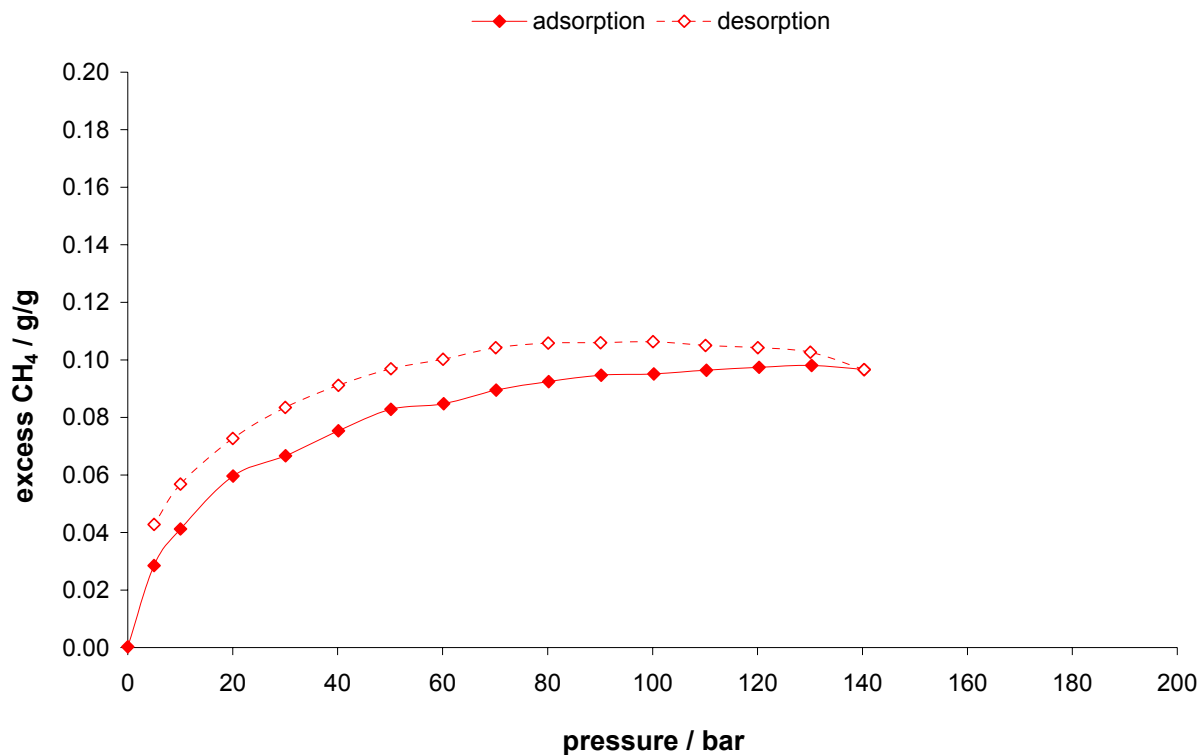

Figure S22. High pressure gravimetric methane adsorption and desorption isotherm of DBF-25.

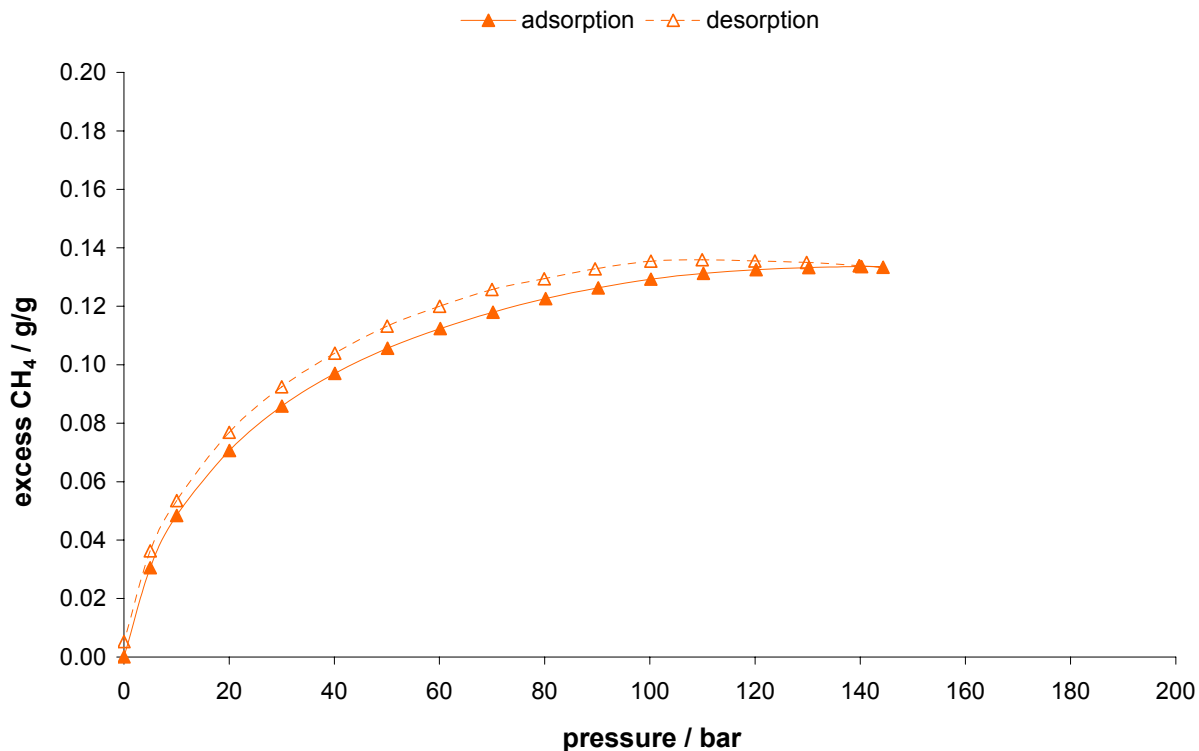

Figure S23. High pressure gravimetric methane adsorption and desorption isotherm of DBT-10.

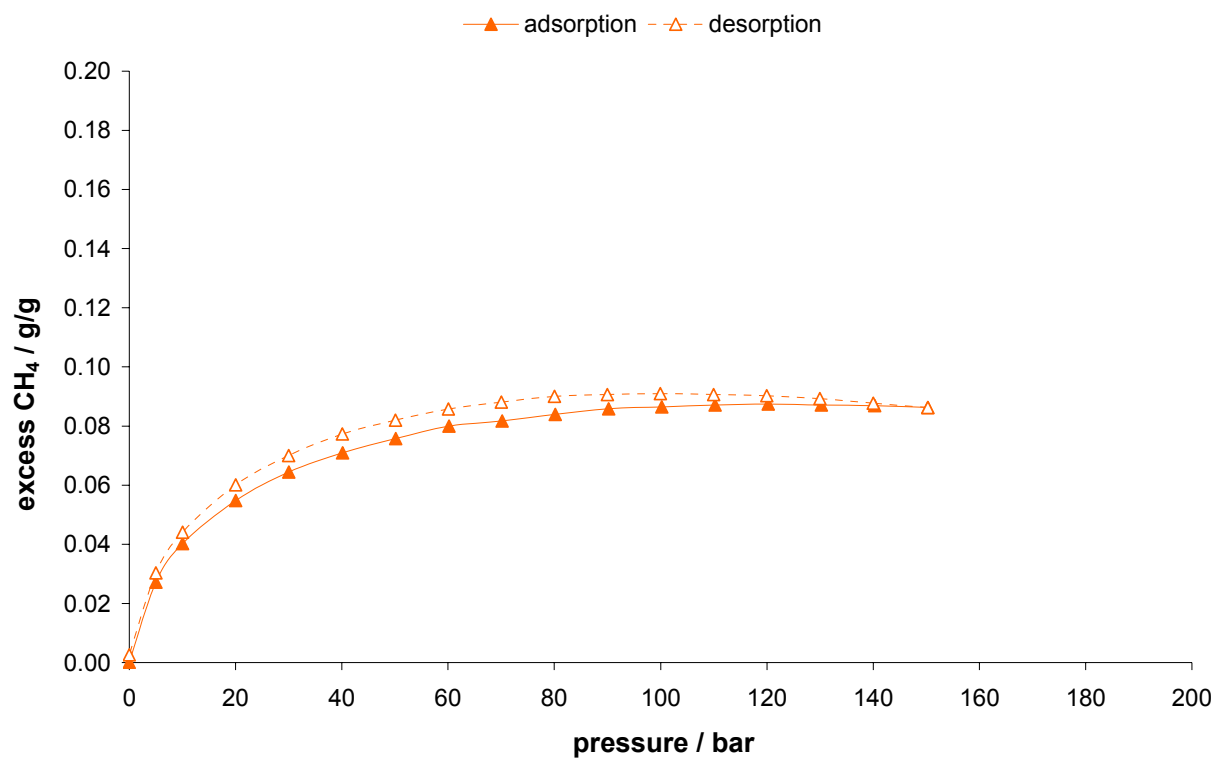

**Figure S24.** High pressure gravimetric methane adsorption and desorption isotherm of **DBT-25**.



## Light-Optical Microscopy (LOM)

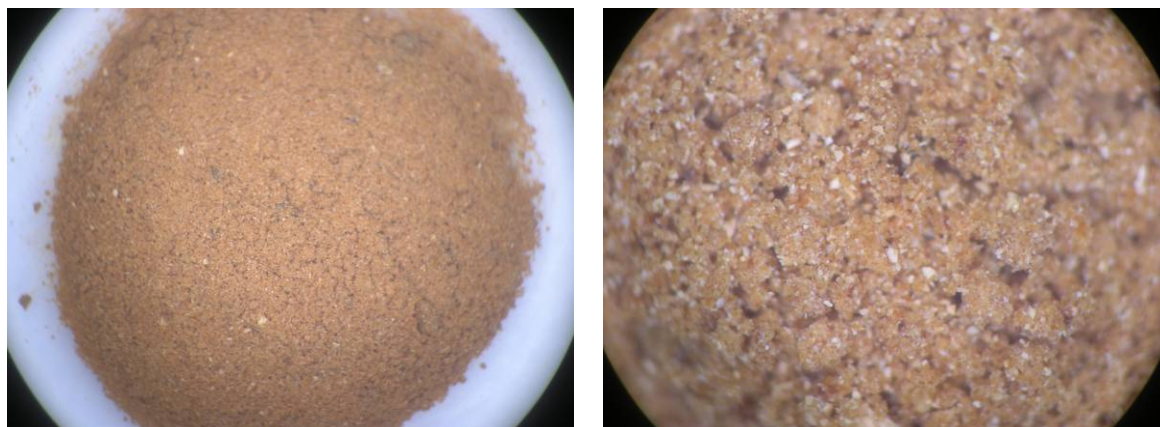

Figure S25. Light-optical micrographs of FLUO-10.

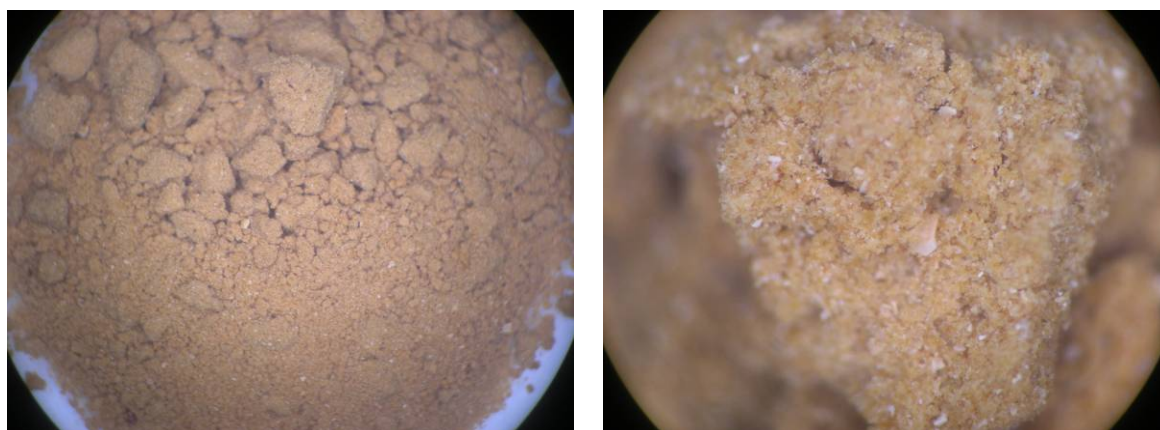

Figure S26. Light-optical micrographs of sFLUO-10.

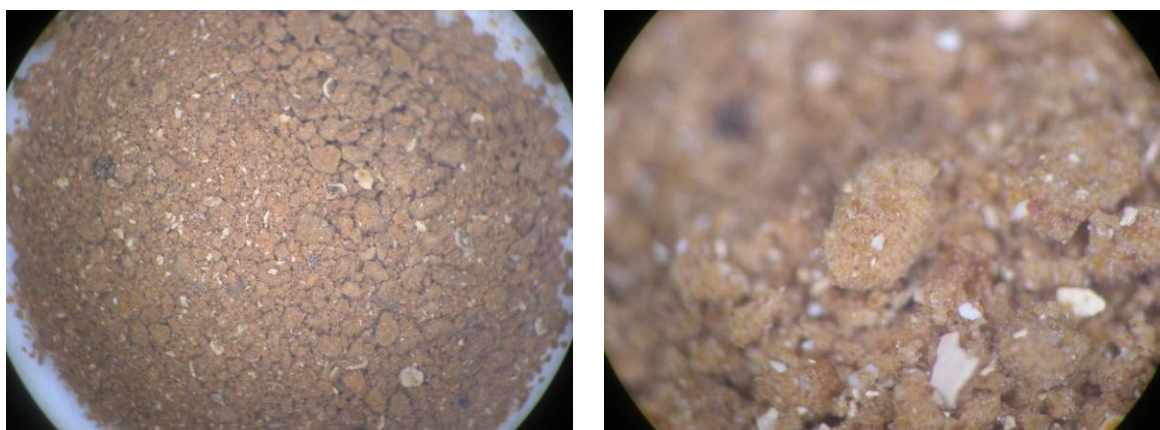

Figure S27. Light-optical micrographs of DBF-10.

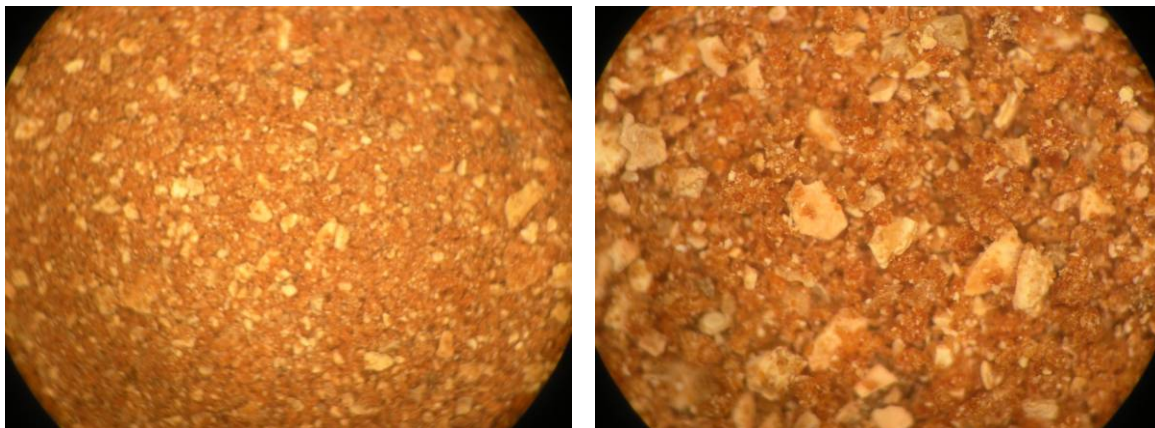

**Figure S28.** Light-optical micrographs of **DBT-10**.

## Scanning Electron Microscopy (SEM)

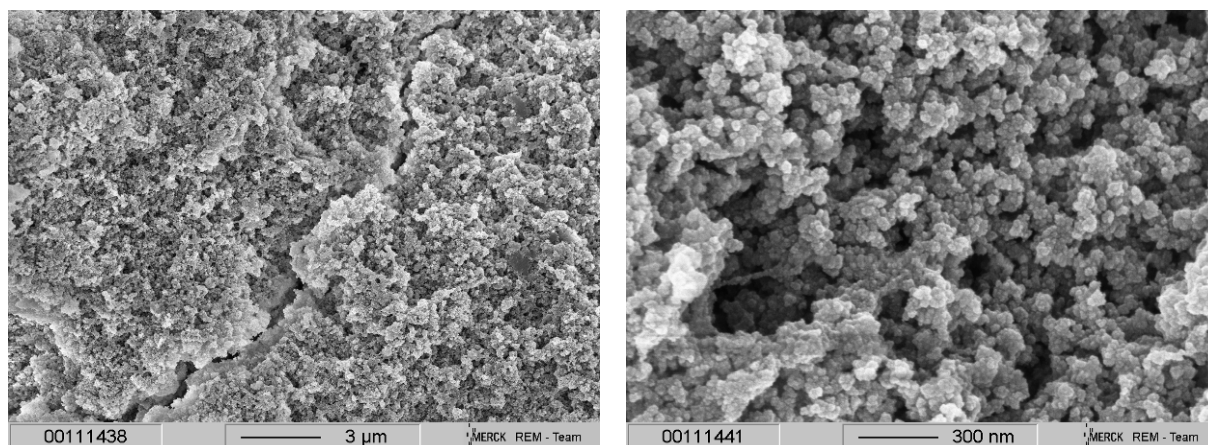

Figure S29. Scanning electron micrographs of sFLUO-10.

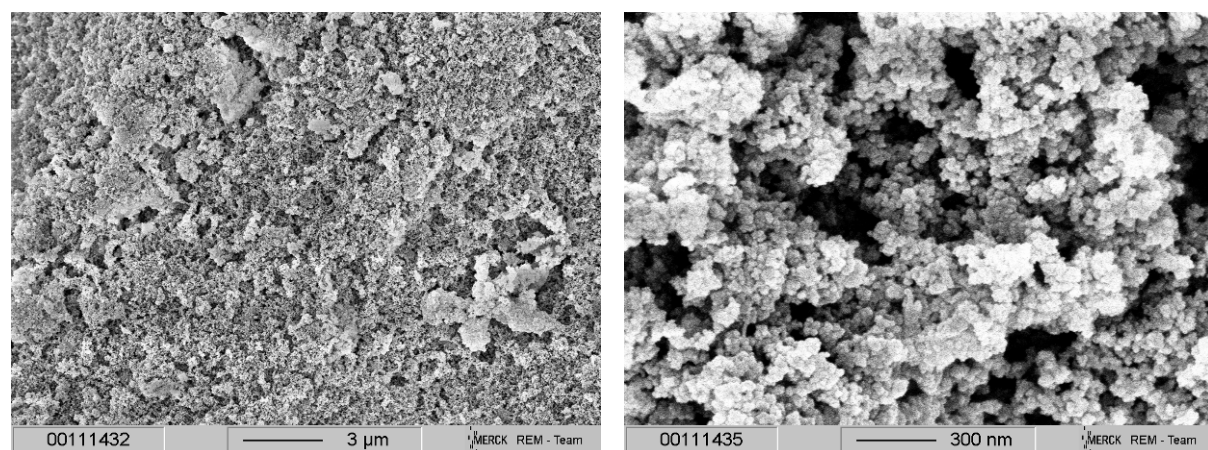

Figure S30. Scanning electron micrographs of DBF-10.
